# Supplementary material for: Self-assembly of silicon/carbon hybrids and natural graphite as anode materials for lithium-ion batteries
Source: Royal Society of Chemistry journal article supplement (doi:10.1039/c6ra20131h), 2016-01-01
Supplement: c6ra20131h1.pdf [file c6ra20131h1.pdf]

## Electronic Supplementary Information (ESI)

Self-assembly of silicon/carbon hybrids and natural graphite as anode  
materials for lithium-ion batteries

Aoning Wang, Fandong Liu, Zhoulu Wang and Xiang Liu\*

Key Laboratory of Flexible Electronics (KLOFE) & Institute of Advanced Materials  
(IAM), National Jiangsu Synergistic Innovation Center for Advanced Materials  
(SICAM), Nanjing Tech University (Nanjing Tech), 30 South Puzhu Road, Nanjing,  
Jiangsu 211816, China

\*Authors to whom correspondence should be addressed:

Dr. Xiang Liu, Email: [iamxliu@njtech.edu.cn](mailto:iamxliu@njtech.edu.cn)

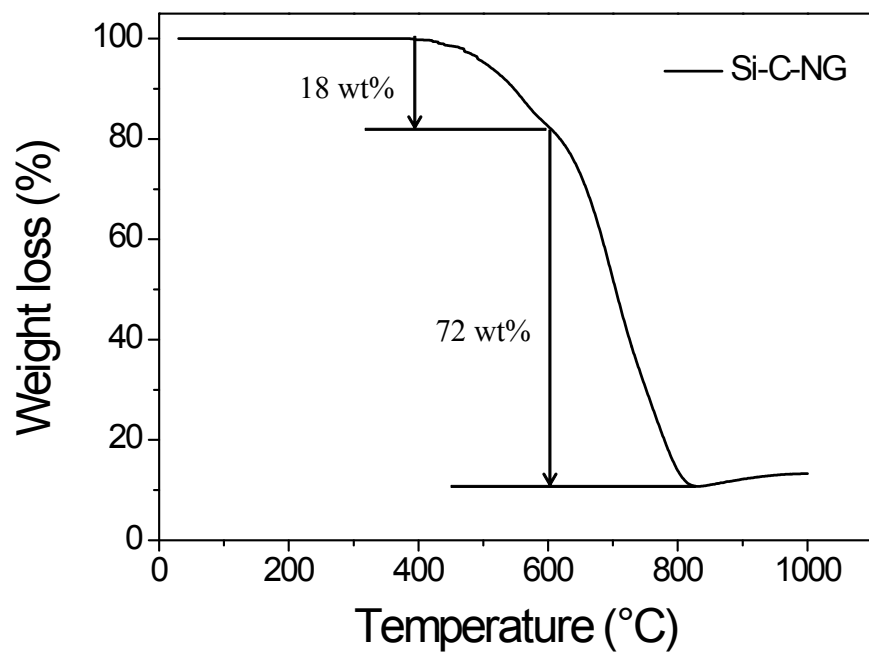

Figure S1. Thermogravimetric curve of Si-C-NG composites.

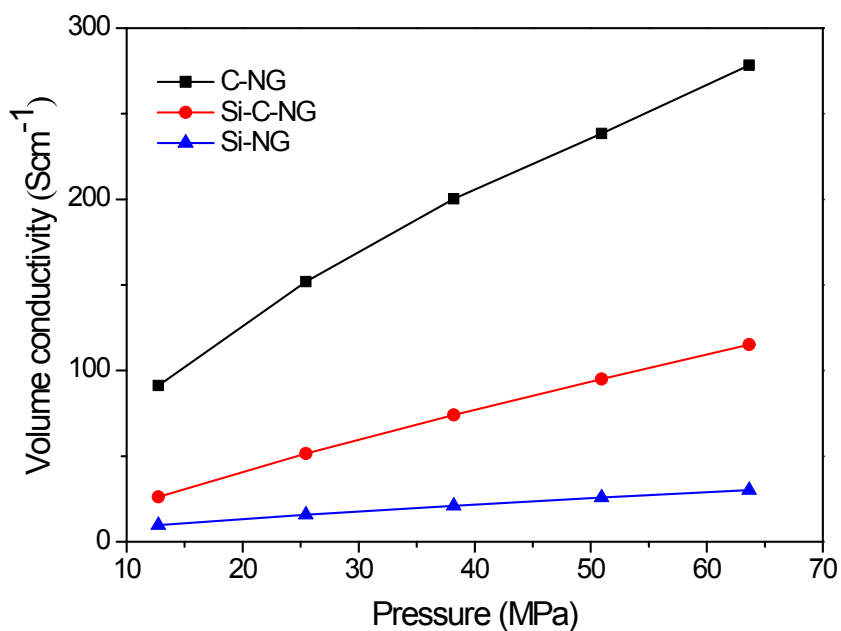

Figure S2. Electrical conductivities of Si-NG mixtures, Si-C-NG composites and C-NG composites.

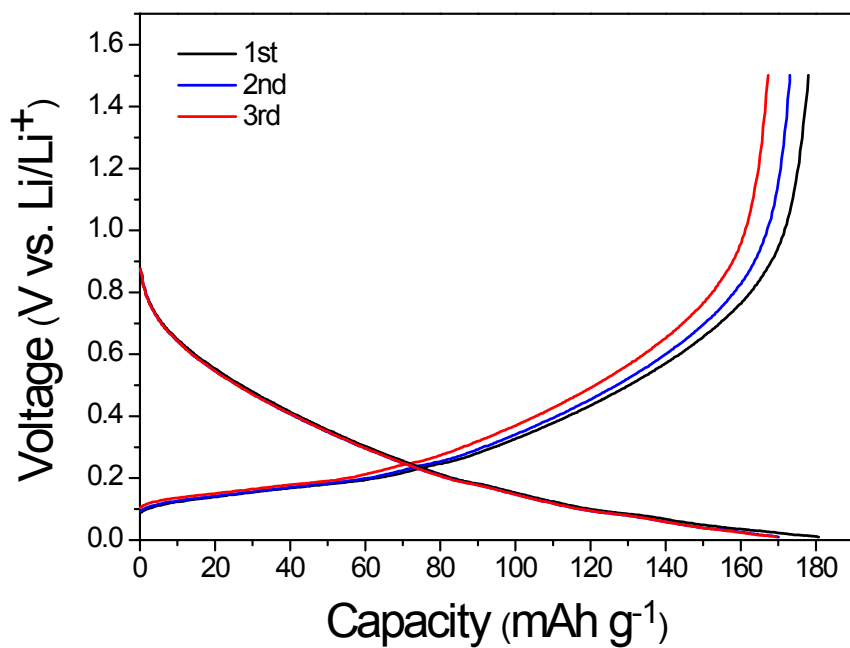

Figure S3. The charge/discharge profiles of the pyrolytic carbon derived from poly(AN-co-DVB) at the first three cycles (current density: 100 mA g<sup>-1</sup>).

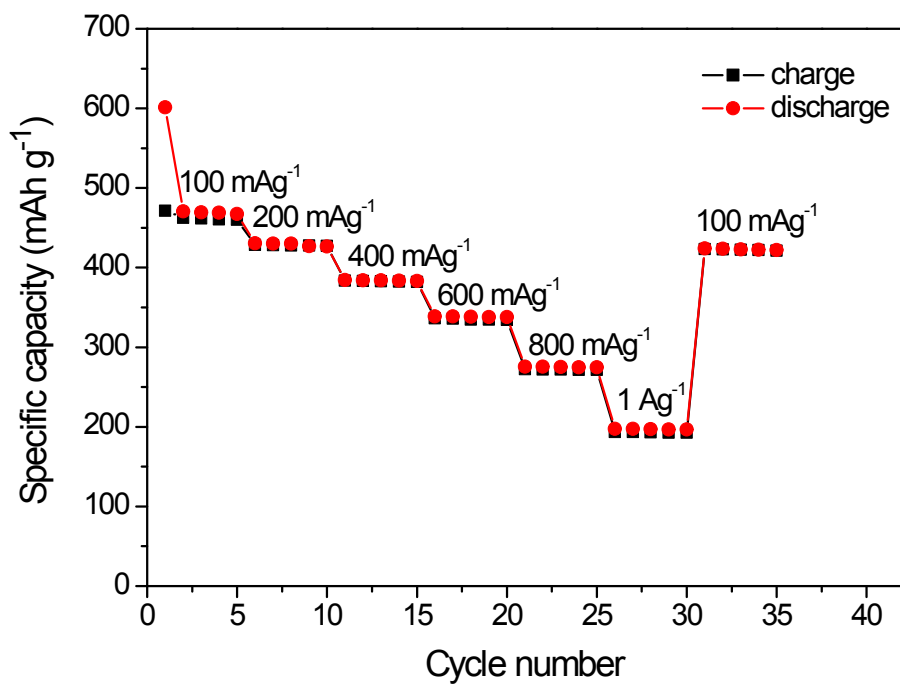

Figure S4. Rate performance of Si-C-NG composites at various current densities.

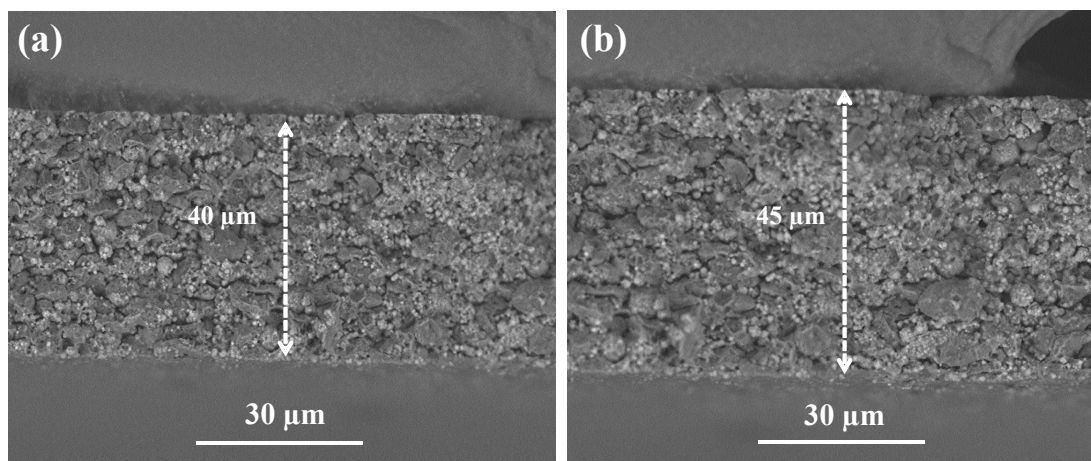

Figure S5. Cross-sectional SEM images of Si-C-NG composites electrodes, (a) after 30 cycles; (b) after 50 cycles.
